# Supplementary material for: The utilization of pH sensitive spirocyclic rhodamine dyes for monitoring D-fructose consumption during a fermentation process
Source: Royal Society of Chemistry journal article supplement (doi:10.1039/c3nj00613a), 2013-01-01
Supplement: c3nj00613a.pdf [file c3nj00613a.pdf]

## Electronic Supplementary Information

### The utilization of pH sensitive spirocyclic rhodamine dyes for monitoring D-fructose consumption during a fermentation process

Erman Karakuş, Muhammed Üçüncü, Ritchie Eanes and Mustafa Emrulloğlu<sup>\*a</sup>

<sup>a</sup> Department of Chemistry, Faculty of Science, İzmir Institute of Technology, Urla-35430, İzmir, Turkey

| CONTENTS                                                                                                                      | PAGE |
|-------------------------------------------------------------------------------------------------------------------------------|------|
| 1. General Method                                                                                                             | S2   |
| 2. Synthesis of <b>1a</b> , <b>1b</b> and <b>1c</b> from Rhodamine B                                                          | S2   |
| 3. UV-Vis Titration of <b>SS-1</b> to <b>SS-5</b> with Saccharide Derivatives                                                 | S3   |
| 4. Effect of Water Content                                                                                                    | S3   |
| 5. Change in Acidity upon Addition of Increasing Concentrations of D-Fructose to <b>SS-1</b>                                  | S3   |
| 6. pH Change Profile for <b>SS-2</b> upon Addition of D-Fructose at Various pH Conditions                                     | S4   |
| 7. Emission Intensity of the Sensing System Employing Different Rhodamine Derivatives ( <b>1a</b> , <b>1b</b> and <b>1c</b> ) | S5   |
| 8. Absorption and Emission Spectra of <b>SS-2</b> at Initial pH 7.00 and 5.25                                                 | S5   |
| 9. pH-Dependent Fluorescence Response of Rhodamine <b>1a</b>                                                                  | S6   |
| 10. Fluorescence Intensity Spectrum upon Addition of D-Fructose to the Sensing Systems Using Variations of Arylboronic Acids  | S6   |
| 11. Time Dependent Fluorescence Intensity Change                                                                              | S7   |
| 12. Saccharide selectivity profiles of all Sensing Systems                                                                    | S7   |
| 13. Colorimetric and Fluorometric Detection of D-Fructose                                                                     | S8   |
| 14. Calibration Curve                                                                                                         | S8   |

## 1. General Methods

All reagents for synthesis were purchased from commercial suppliers (Aldrich and Merck) and used without further purification. Absolute methanol and distilled water were used throughout the experiment. The pH was recorded by WTW InoLab pH 720 precision pH meter (Weilheim, Germany). UV absorption spectra were obtained on a Shimadzu UV-2550 Spectrophotometer. Fluorescence emission spectra were obtained using a Varian Cary Eclipse Fluorescence spectrophotometer. The slit width was 5.0 nm for both excitation and emission. The emission spectra were integrated over the range 525 nm to 700 nm in 2.00 mm path length quartz cells (0.5 mL volume). All measurements were conducted at least in triplicate.

## 2. Synthesis of 1a, 1b and 1c from Rhodamine B

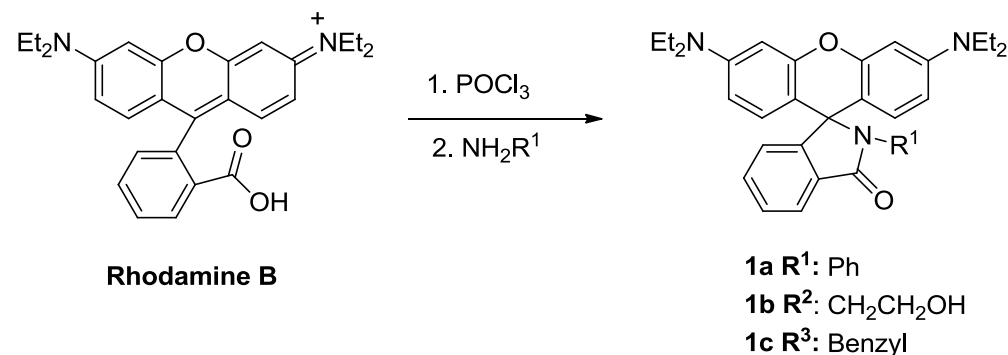

**Scheme 1.** Synthesis of Rhodamine derivatives **1a-c**

The product **1a**<sup>1</sup>, **1b**<sup>2</sup> and **1c**<sup>3</sup> were synthesized according to the literature procedures.

## References

1. X. Zhang, Y. Shiraishi and T. Hirai, *Tetrahedron Lett.*, 2007, **48**, 5455-5459.
2. Y. Zhao, X.-B. Zhang, Z.-X. Han, L. Qiao, C.-Y. Li, L.-X. Jian, G.-L. Shen, R.-Q. Yu, *Anal. Chem.*, 2009, **81**, 7022-7030.
3. A. Chatterjee, M. Santra, N. Won, S. Kim, J. K. Kim, S. B. Kim, K. H. Ahn, *J. Am. Chem. Soc.*, 2009, **131**, 2040-2041.

### 3. UV-Vis Titration of SA-1 to SA-5 with Saccharide Derivatives

A solution of **1a**, **1b** and **1c** (25  $\mu$ M) and all arylboronic acid derivatives (50 mM) were prepared in distilled water and absolute methanol (3/7 v/v). Also, all saccharide solutions were prepared in distilled water and absolute methanol (3/7 v/v). A solution containing compound **1a** (or **1b** and **1c**), arylboronic acid and different portions of saccharide solutions (1, 5, 10, 25, 50, 100, 250, and 500mM) were mixed in falcon tubes. They were placed in a quartz cell (2.0 mm width), and the absorption spectrum was recorded at 25  $^{\circ}$ C and their corresponding UV-Vis curves were recorded.

### 4. Effect of Water Content

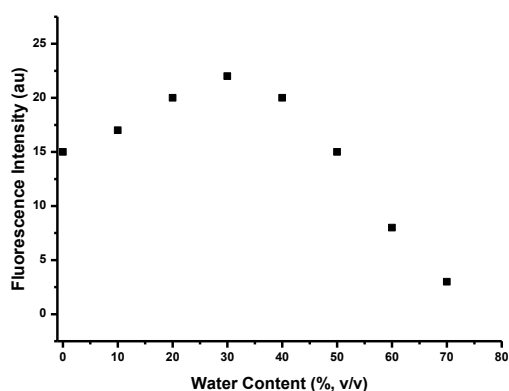

**Figure S1.** Effect of water content on the fluorescence intensity of **SS-1** (**1a** [25 $\mu$ M] and **PBA** [50mM]) upon addition of D-fructose [100mM].  $\lambda_{ex}$ :525nm

### 5. Change in Acidity upon Addition of Increasing Concentrations of D-Fructose to SS-1

**Table S1.** Change in acidity upon addition of increasing concentrations of D-fructose to **SS-1** in water/methanol (3:7, v/v)

| D-fructose, [mM]         | 0                 | 1    | 5    | 10   | 25   | 50   | 100  | 250  | 500  |
|--------------------------|-------------------|------|------|------|------|------|------|------|------|
| pH <sup>a</sup>          | 5.90 <sup>a</sup> | 5.85 | 5.53 | 4.83 | 4.44 | 4.32 | 4.04 | 3.89 | 3.82 |
| $\Delta$ pH <sup>b</sup> | 0                 | 0.05 | 0.37 | 1.07 | 1.46 | 1.58 | 1.86 | 2.01 | 2.08 |

<sup>a</sup> relative pH values of sensing system **SS-1** after addition of increasing concentrations of D-fructose <sup>b</sup> decrease in pH of the solution (**SS-1**) after addition of D-fructose determined by a standard by pH meter

## 6. pH Change Profile for SS-2 upon Addition of D-Fructose at Various pH Conditions

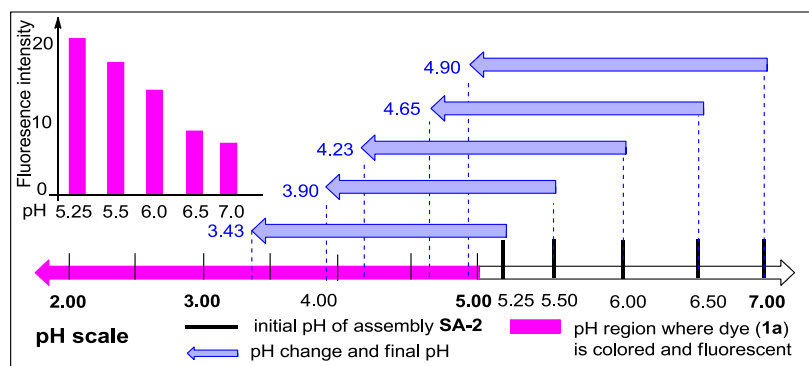

**Figure S2.** pH change profile for **SS-2** upon addition of D-fructose [100mM] at various pH conditions; the inset shows the relative fluorescence intensities of **SS-2** upon addition of D-fructose [100mM] at various pH conditions (pH 5.2, 5.5, 6.0, 6.5 and 7.0).

## 7. Emission Intensity of the Sensing System Employing Different Rhodamine Derivatives (**1a**, **1b** and **1c**)

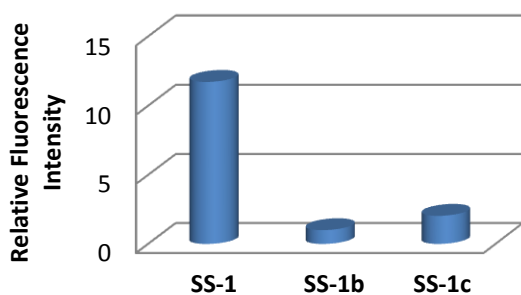

|       |                      |
|-------|----------------------|
| SS    | (boronic acid + dye) |
| SS-1  | PBA + <b>1a</b>      |
| SS-1b | PBA + <b>1b</b>      |
| SS-1c | PBA + <b>1c</b>      |

**Figure S3.** Relative fluorescence intensity of sensing system employing different dyes (PBA [50mM] + dye **1a**, **1b**, **1c** [25  $\mu$ M]), upon addition of D-fructose [100mM].  $\lambda_{ex}$ :525nm

## 8. Absorption and Emission Spectra of SS-2 at Initial pH 7.0 and 5.2

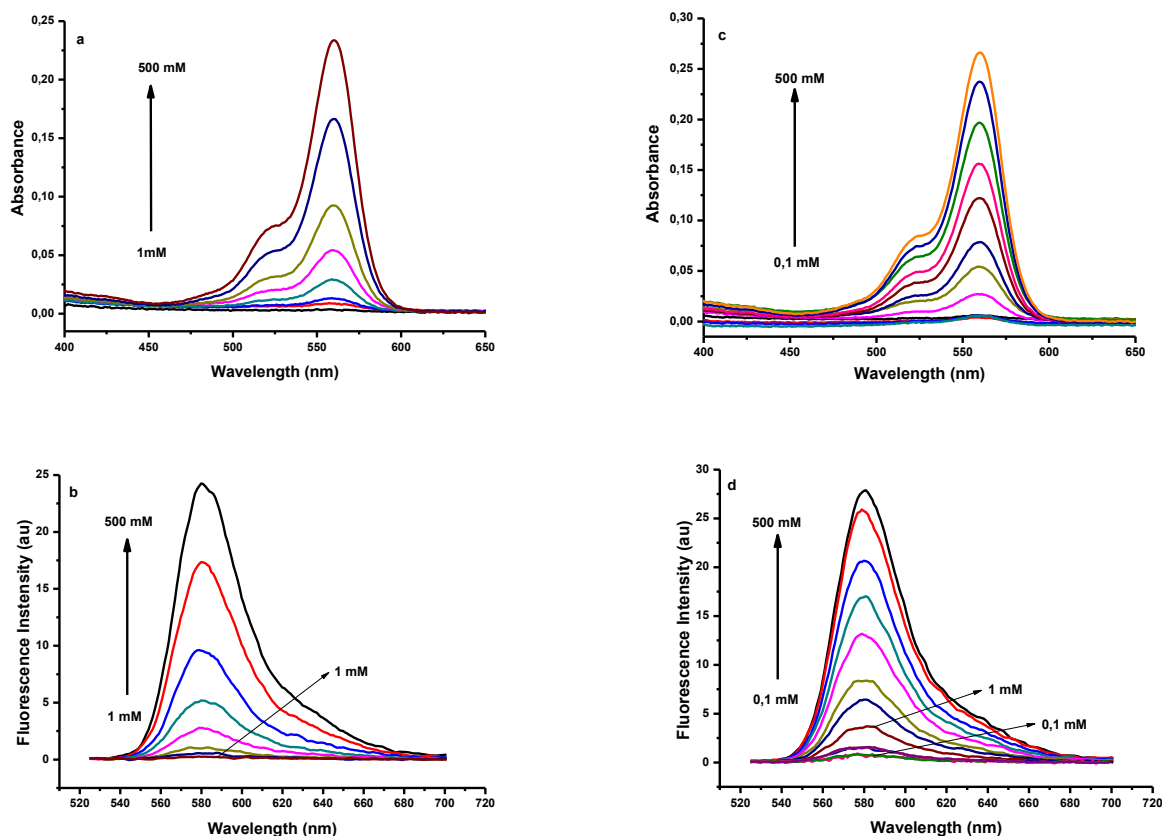

**Figure S4.** a) Absorption and b) Emission spectra of **SS-2** in water/methanol (3:7, v/v, **pH:7.0**) c) Absorption and d) emission spectra of **SS-2** in water/methanol (3:7, v/v, **pH 5.2**) with increasing concentrations of D-fructose [0.1, 0.25, 0.5, 0.75, 1.0, 5.0, 10, 25, 50, 100, 250 and 500 mM].

## 9. pH-Dependent Fluorescence Response of Rhodamine 1a

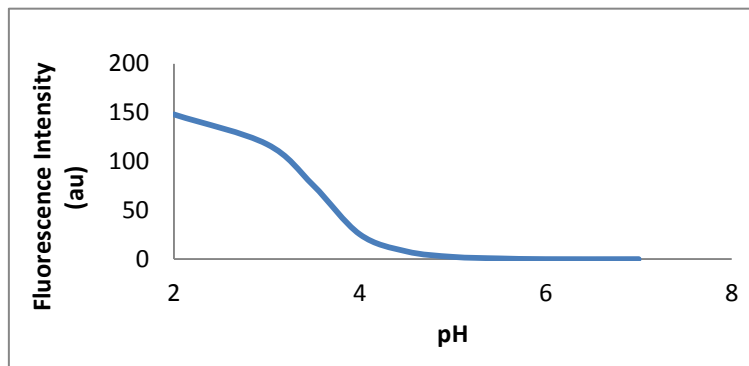

**Figure S5.** pH-Dependent fluorescence response of dye **1a** in water/methanol (3:7, v/v).

## 10. Fluorescence Intensity Spectrum upon Addition of D-Fructose to the Sensing Systems Using Variations of Aryl boronic Acids

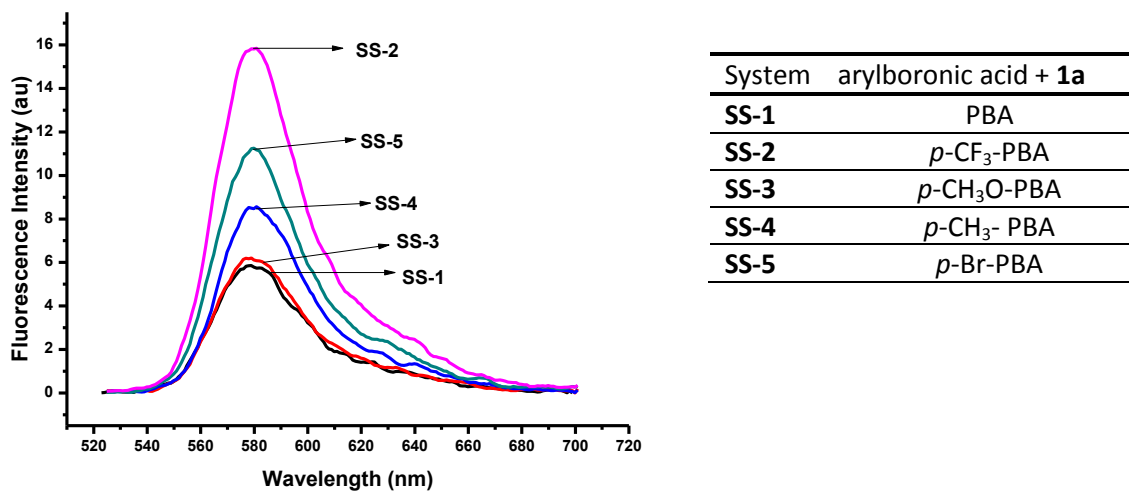

**Figure S6.** Emission spectra for **SS-1**, **SS-2**, **SS-3**, **SS-4** and **SS-5** in water/methanol (3:7, v/v) after the addition of D-fructose [100mM].  $\lambda_{ex}$ :525 nm

## 11. Time Dependent Fluorescence Intensity Change

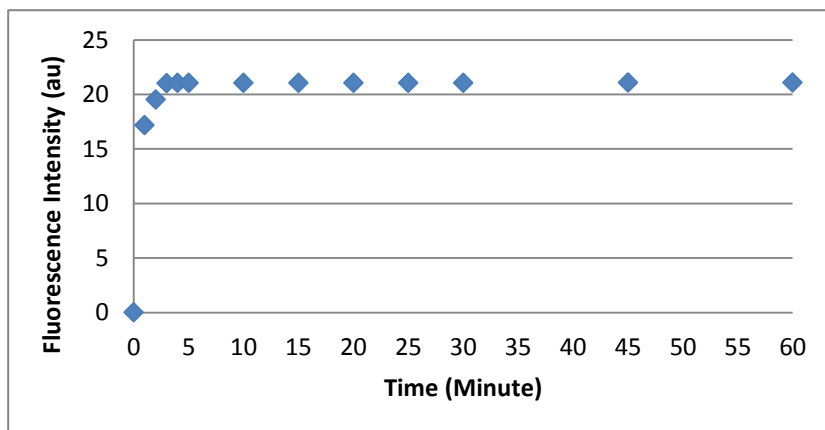

**Figure S7.** Time dependent fluorescence intensity change of **SS-2** upon addition of [100 mM] D-fructose in water/methanol (3:7, v/v, pH 5.2)  $\lambda_{ex}$ :525nm

## 12. Saccharide selectivity profiles of all sensing systems

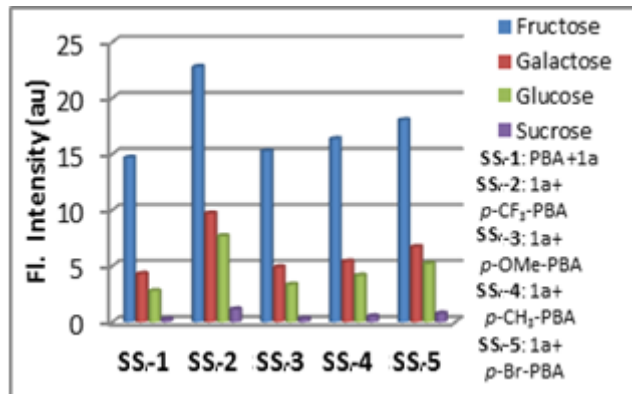

**Figure S8.** Fluorescence intensities for SS-1, SS-2, SS-3, SS-4 and SS-5 (dye/boronic acid (25 $\mu$ M/50mM)) after adding saccharides (D-fructose, D-glucose, D-galactose, and D-Sucrose, [100mM]) in water/methanol (3:7, v/v, pH 5.2).  $\lambda_{\text{ex}}$ :525nm

## 13. Colorimetric and Fluorometric Detection of D-fructose

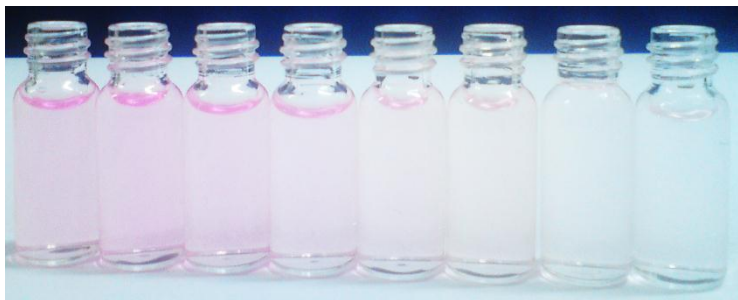

**Figure S9.** Colorimetric response of SS-2 (1a [25  $\mu$ M] and *p*-CF<sub>3</sub>-PBA [50 mM]) to various concentrations of D-fructose in water/methanol (3:7, v/v, pH 5.2). [left to right: 500, 250, 100, 50, 25, 10, 5, and 1 mM]

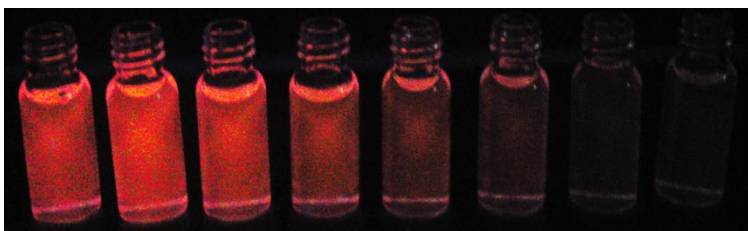

**Figure S10.** Fluorometric response of SS-2 (1a [25  $\mu$ M] and *p*-CF<sub>3</sub>-PBA [50 mM]) to various concentrations D-fructose in water/methanol (3:7, v/v, pH 5.2). [left to right: 500, 250, 100, 50, 25, 10, 5, and 1 mM]

#### 14. Calibration Curve

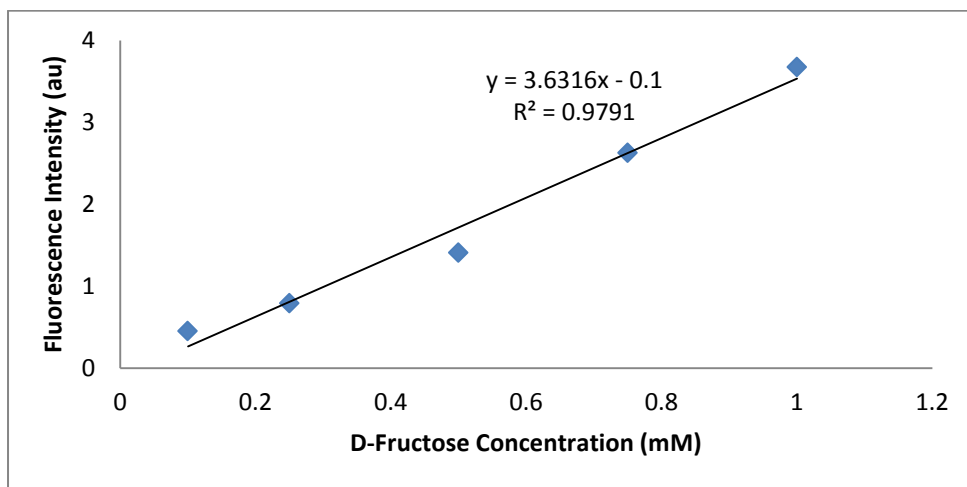

**Figure S11.** Calibration emission spectra of **SS-2** in water/methanol (3:7, v/v, pH 5.2) with increasing concentrations of D-fructose [0.1, 0.25, 0.5, 0.75, 1.0 mM]
